# Supplementary material
Source: publisher figshare collection journal article supplement (https://tandf.figshare.com/ndownloader/files/38179799)
Supplement: Supplementary file 1 [file 38179799]

**Appendix D Table 1. One-handed Tasks scale scoring, split by DIF laterality subgroups**

|  | Unilateral Group | |  | Bilateral Group | |
| --- | --- | --- | --- | --- | --- |
| Raw summed Score | T-score | Standard Error |  | T-score | Standard Error |
| 9 | 39.14 | 10.22 |  | 36.59 | 10.54 |
| 10 | 46.59 | 6.05 |  | 44.92 | 6.65 |
| 11 | 51.78 | 4.76 |  | 51.41 | 5.35 |
| 12 | 55.46 | 4.27 |  | 56.05 | 4.70 |
| 13 | 58.59 | 4.05 |  | 59.84 | 4.38 |
| 14 | 61.62 | 4.05 |  | 63.24 | 4.22 |
| 15 | 64.76 | 4.22 |  | 66.54 | 4.27 |
| 16 | 68.32 | 4.65 |  | 70.22 | 4.70 |
| 17 | 73.35 | 6.00 |  | 75.19 | 5.95 |
| 18 | 80.70 | 10.16 |  | 82.49 | 10.16 |

**Appendix D Table 2. Two-handed Tasks scale scoring, split by DIF laterality and sex subgroups**

|  | Unilateral, Male | | |  | Unilateral, Female | | |  | | Bilateral, Male | | |  | Bilateral, Female | |
| --- | --- | --- | --- | --- | --- | --- | --- | --- | --- | --- | --- | --- | --- | --- | --- |
| Raw summed Score | T-score | Standard Error |  | | T-score | Standard Error |  | | T-score | | Standard Error |  | | T-score | Standard Error |
| 20 | 29.33 | 10.34 |  | | 29.55 | 10.34 |  | | 28.54 | | 10.34 |  | | 28.54 | 10.34 |
| 21 | 36.35 | 5.79 |  | | 36.57 | 5.79 |  | | 35.56 | | 5.79 |  | | 35.56 | 5.79 |
| 22 | 40.62 | 4.21 |  | | 40.84 | 4.21 |  | | 39.83 | | 4.21 |  | | 39.83 | 4.21 |
| 23 | 43.26 | 3.54 |  | | 43.54 | 3.60 |  | | 42.47 | | 3.54 |  | | 42.53 | 3.60 |
| 24 | 45.28 | 3.20 |  | | 45.56 | 3.20 |  | | 44.49 | | 3.20 |  | | 44.49 | 3.20 |
| 25 | 46.91 | 2.92 |  | | 47.19 | 2.92 |  | | 46.12 | | 2.92 |  | | 46.18 | 2.92 |
| 26 | 48.37 | 2.75 |  | | 48.65 | 2.75 |  | | 47.58 | | 2.75 |  | | 47.64 | 2.75 |
| 27 | 49.66 | 2.64 |  | | 49.94 | 2.64 |  | | 48.88 | | 2.64 |  | | 48.93 | 2.64 |
| 28 | 50.84 | 2.53 |  | | 51.12 | 2.53 |  | | 50.11 | | 2.53 |  | | 50.17 | 2.58 |
| 29 | 51.97 | 2.47 |  | | 52.25 | 2.47 |  | | 51.24 | | 2.47 |  | | 51.29 | 2.47 |
| 30 | 53.03 | 2.42 |  | | 53.31 | 2.42 |  | | 52.30 | | 2.42 |  | | 52.36 | 2.42 |
| 31 | 54.04 | 2.36 |  | | 54.33 | 2.36 |  | | 53.31 | | 2.36 |  | | 53.43 | 2.42 |
| 32 | 55.06 | 2.36 |  | | 55.34 | 2.36 |  | | 54.33 | | 2.36 |  | | 54.38 | 2.36 |
| 33 | 56.01 | 2.30 |  | | 56.29 | 2.30 |  | | 55.28 | | 2.30 |  | | 55.39 | 2.30 |
| 34 | 56.97 | 2.30 |  | | 57.25 | 2.30 |  | | 56.24 | | 2.30 |  | | 56.35 | 2.30 |
| 35 | 57.87 | 2.30 |  | | 58.15 | 2.25 |  | | 57.19 | | 2.25 |  | | 57.30 | 2.30 |
| 36 | 58.82 | 2.25 |  | | 59.04 | 2.25 |  | | 58.09 | | 2.25 |  | | 58.20 | 2.25 |
| 37 | 59.72 | 2.25 |  | | 59.94 | 2.25 |  | | 58.99 | | 2.25 |  | | 59.10 | 2.25 |
| 38 | 60.62 | 2.25 |  | | 60.84 | 2.25 |  | | 59.89 | | 2.25 |  | | 60.00 | 2.25 |
| 39 | 61.52 | 2.25 |  | | 61.74 | 2.25 |  | | 60.79 | | 2.25 |  | | 60.90 | 2.25 |
| 40 | 62.42 | 2.25 |  | | 62.64 | 2.25 |  | | 61.63 | | 2.25 |  | | 61.80 | 2.25 |
| 41 | 63.31 | 2.25 |  | | 63.48 | 2.25 |  | | 62.53 | | 2.25 |  | | 62.70 | 2.25 |
| 42 | 64.21 | 2.25 |  | | 64.38 | 2.25 |  | | 63.43 | | 2.25 |  | | 63.60 | 2.25 |
| 43 | 65.11 | 2.25 |  | | 65.28 | 2.25 |  | | 64.33 | | 2.25 |  | | 64.49 | 2.25 |
| 44 | 66.07 | 2.30 |  | | 66.18 | 2.25 |  | | 65.22 | | 2.25 |  | | 65.39 | 2.25 |
| 45 | 66.97 | 2.30 |  | | 67.13 | 2.30 |  | | 66.12 | | 2.25 |  | | 66.29 | 2.25 |
| 46 | 67.92 | 2.30 |  | | 68.03 | 2.30 |  | | 67.02 | | 2.30 |  | | 67.19 | 2.30 |
| 47 | 68.93 | 2.36 |  | | 69.04 | 2.36 |  | | 67.98 | | 2.30 |  | | 68.15 | 2.30 |
| 48 | 69.94 | 2.42 |  | | 70.00 | 2.36 |  | | 68.99 | | 2.36 |  | | 69.16 | 2.36 |
| 49 | 70.96 | 2.42 |  | | 71.07 | 2.42 |  | | 70.00 | | 2.42 |  | | 70.17 | 2.42 |
| 50 | 72.02 | 2.53 |  | | 72.13 | 2.47 |  | | 71.07 | | 2.47 |  | | 71.24 | 2.47 |
| 51 | 73.20 | 2.58 |  | | 73.26 | 2.58 |  | | 72.19 | | 2.58 |  | | 72.36 | 2.53 |
| 52 | 74.44 | 2.70 |  | | 74.49 | 2.70 |  | | 73.43 | | 2.64 |  | | 73.54 | 2.64 |
| 53 | 75.79 | 2.81 |  | | 75.79 | 2.81 |  | | 74.72 | | 2.81 |  | | 74.89 | 2.81 |
| 54 | 77.25 | 2.98 |  | | 77.30 | 2.98 |  | | 76.18 | | 2.98 |  | | 76.35 | 2.98 |
| 55 | 78.93 | 3.20 |  | | 78.99 | 3.20 |  | | 77.92 | | 3.20 |  | | 78.03 | 3.20 |
| 56 | 81.01 | 3.60 |  | | 81.07 | 3.60 |  | | 79.94 | | 3.60 |  | | 80.06 | 3.60 |
| 57 | 83.76 | 4.27 |  | | 83.76 | 4.27 |  | | 82.70 | | 4.27 |  | | 82.81 | 4.27 |
| 58 | 88.09 | 5.84 |  | | 88.09 | 5.84 |  | | 87.02 | | 5.84 |  | | 87.13 | 5.84 |
| 59 | 95.11 | 10.39 |  | | 95.17 | 10.39 |  | | 94.10 | | 10.39 |  | | 94.16 | 10.39 |
